# Supplementary material
Source: PubMed Central journal article supplement (PMC6598130)

## Legends for Supplemental files

### Supplemental File 1.

Western blot analyses of phosphorylation and protein expression of EGFR/ErbB1-3 receptors in human primary UM-SCV-7 vulva carcinoma cells after Ad-DCN transduction. A. Quantified signals of EGFR/ErbB1-3 expression and activation in Ad-LacZ and Ad-DCN transduced cells. B. Western blot images of quantified signals.

### Supplemental File 2.

Representative Western blot images of EGFR/HER1 (A) and ErbB2/HER2 (B) protein and phosphorylation levels after Ad-DCN and Ad-LacZ transfection of A431 vulva carcinoma cells. Note, that the protein level of the phosphorylated form of EGFR/HER1 is downregulated after Ad-DCN transduction. Furthermore, both the protein level of ErbB2/HER2 and its phosphorylated form are downregulated in transduced cells.

### Supplemental File 3.

Representative Western blot images of p62 protein amount in Ad-DCN and Ad-LacZ transduced UM-SCV-7 primary vulva carcinoma cells. Note that there is no difference in the protein amount of p62 in Ad-DCN transduced cells compared to Ad-LacZ transduced cells.

**A**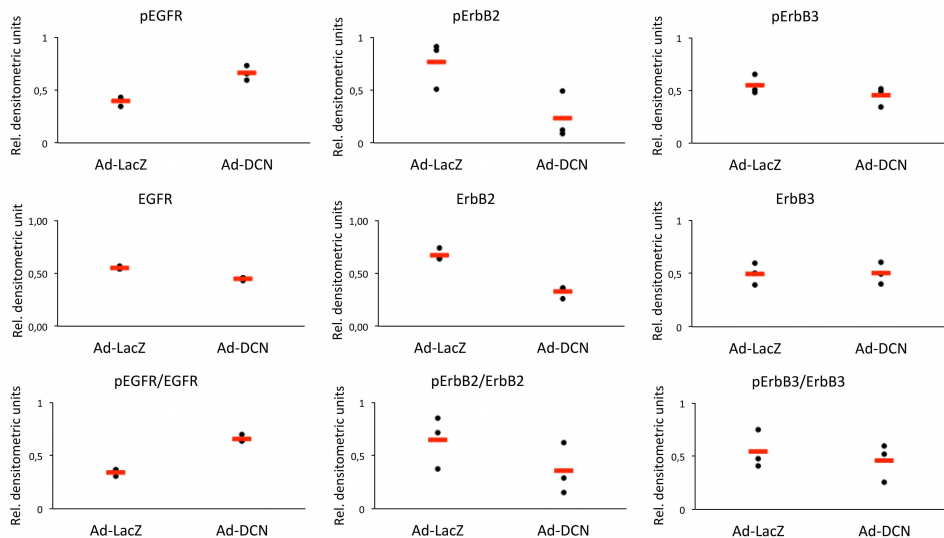**B**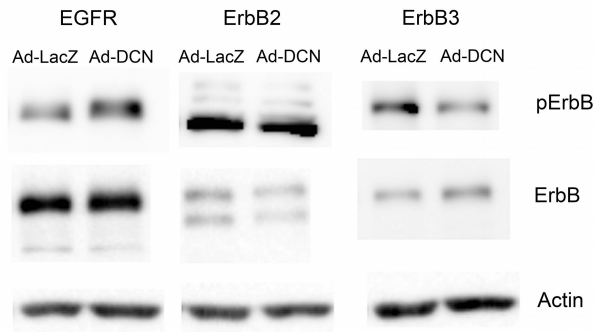

**A.**

EGFR/HER1

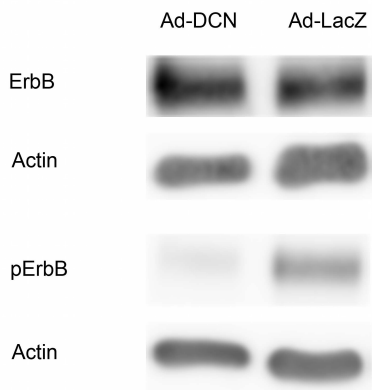**B.**

ErbB2/HER2

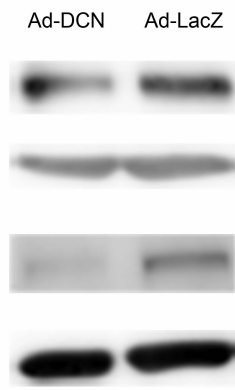

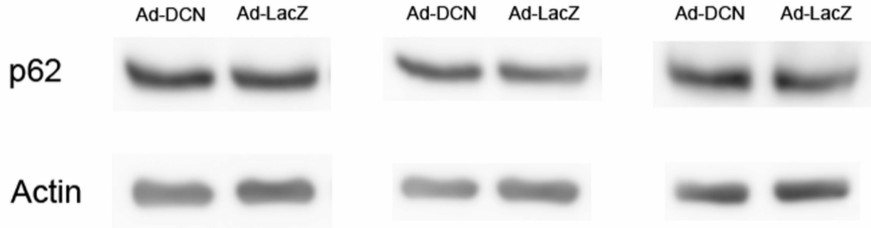

Supplement: DS_10.13690022155419845373.pdf [file DS_10.13690022155419845373.pdf]
